1 Co-creating a *Choosing Wisely* Leaflet Supporting the Reduction of  
2 Imaging Usage in Low Back Pain Management - A Multi-Method Study.

3  
4 **Authors**

5 Chris Djurtoft <sup>1</sup>, Edel O'Hagan <sup>2</sup>, Monika D. Laursen <sup>3</sup>, Lars Lejbølle <sup>3</sup>, Mia Bisgaard <sup>3</sup>, Simon K. Johansen <sup>1</sup>,  
6 Kristian D. Lyng <sup>1,4</sup>, Morten Hoegh <sup>4</sup>, Negar Pourbordbari <sup>1</sup>, Malene K. Bruun <sup>1</sup>, Bettina Eiger <sup>4</sup>, Jesper B.  
7 Larsen <sup>4</sup>, Michael S. Rathleff <sup>1,4,5</sup>.

8  
9 **Affiliations**

- 10 1. Center for General Practice at Aalborg University, Denmark.  
11 2. Westmead Applied Research Centre, Faculty of Medicine and Health, The University of Sydney, Australia  
12 3. North Denmark Region, Patient pathways and Economy, Aalborg, Denmark.  
13 4. Department of Health Science and Technology, Faculty of Medicine, Aalborg University, Denmark.  
14 5. Department of Physical Therapy and Occupational Therapy, Aalborg University Hospital, Aalborg, Denmark

15  
16 **Corresponding author:** Chris Djurtoft, Center for General Practice at Aalborg University (CAM AAU).  
17 Selma Lagerløfs Vej 249, 9260 Gistrup. E-mail: [cdjurt@dcm.aau.dk](mailto:cdjurt@dcm.aau.dk).

18  
19 **Disclosures:** This research received no specific grant or funding. No funding source had a role in study  
20 design, data collection and analysis, decision to publish, or preparation of the manuscript.

21  
22 **Declaration of interests:** All authors state no conflict of interest. MSH has received support from non-  
23 industrial professional, private, and scientific bodies (reimbursement of travel costs and speaker fees) for  
24 lectures on pain, and he receives book royalties from Gyldendal, Munksgaard Denmark, FADL, and  
25 Muusmann publications. Otherwise, none of the authors declare conflicts of interest.

26  
27 **Institutional Review Board:** North Denmark Region Committee on Health Research Ethics determined that  
28 this study was exempt from ethical approval because of its non-interventional design. Signed informed  
29 consent was obtained from all participants during the think-aloud interviews. All data were stored on a  
30 secure server hosted at Aalborg University and North Denmark Region.

31  
32 **Data availability:** Data will be available upon reasonable request to corresponding author. For copies of the  
33 *Choosing Wisely* leaflet, see the appendix or contact the corresponding author.

35 **Abstract**

36

37 **Introduction:** Low back pain is a global health challenge with negative consequences for both individuals  
38 and healthcare systems. The *Choosing Wisely* initiative aims to improve communication between patients  
39 and clinicians to promote informed healthcare decisions while avoiding unnecessary tests and treatments.  
40 The objective of this project is to co-create an information resource in the form of a leaflet, to be  
41 distributed in clinical settings, websites or social media targeting people with low back pain.

42

43 **Methods:** This multi-method study was conducted in four stages: literature search, input from practice  
44 consultants, program theory development, and think-aloud interviews with people experiencing low back  
45 pain. Each stage was followed by a consensus meeting in which the steering group refined the leaflet based  
46 on the emerging knowledge.

47

48 **Results:** The literature search highlighted patients' need for understandable information about diagnosis,  
49 treatment options, and self-management strategies. Practice consultants emphasized concise, relatable  
50 content. The program theory identified potential mechanisms and design targets for content creation,  
51 development, and implementation of the leaflet, such as addressing patient concerns, reducing diagnostic  
52 uncertainty, offering insights into management options, and validation. Think-aloud interviews with 18  
53 people living with low back pain informed the iteration of the leaflet, enhancing language clarification and  
54 content comprehension.

55

56 **Conclusion:** We co-created a new *Choosing Wisely* leaflet, created with end-users in mind, specifically  
57 focused on reducing unnecessary imaging for low back pain. Valuable feedback from end-users prompted  
58 significant revisions, underscoring the importance of involving multiple end-user viewpoints into the  
59 creation process.

60

61 **Key Words:** Low Back Pain; *Choosing Wisely*; Imaging Diagnostics; Co-creation; Patient Involvement; Patient  
62 Education.

## 63 Introduction

64 Low back pain is a significant public health concern, affecting a large portion of the population and causing  
65 a considerable impact on individual quality of life, work abilities and participation in activities  
66 [18,26,27,35,43]. Although spending on health services has increased, people seeking care for their low  
67 back pain still receive services known to provide low-value or potentially cause harm [4]. These low-value  
68 care options include unnecessary diagnostic imaging,[28] opioids,[1,48] antidepressants,[17] muscle  
69 relaxants,[6] and spinal fusion surgery [24]. This, despite international clinical guidelines finding insufficient  
70 evidence for these management options [30,42,62].

71  
72 An evaluation of routine data collected from patients that attended primary care, showed that fewer than  
73 5% of the magnetic resonance imaging (MRI) requested were clearly indicated [53]. This finding coupled  
74 with the growing concern of unnecessary imaging for low back pain underscores the need for strategies to  
75 improve the accuracy of imaging decisions [30,31]. The mechanisms involved are complex and may  
76 illustrate the multifaceted impact of diagnostic uncertainty, fear of making mistakes (such as defensive  
77 medicine), and patient pressure on clinicians' decision-making processes during consultations [2,10,30,56].  
78 Clinicians' ability to handle diagnostic uncertainty and defensive medicine holds significance across various  
79 domains; this affects decision-making and may result in an increased number of referrals to specialized  
80 sectors and medical tests [3,8–10,55].

81  
82 Patient informational resources have demonstrated efficacy in facilitating informed decision-making and  
83 improving health outcomes compared to usual care [19,59]. These materials can significantly improve  
84 health knowledge, accurate risk perceptions, and patients' active participation in decision-making [19,59].  
85 Certain types of information prove more influential in shaping health behaviors in people living with low  
86 back pain [19,49]. Targeted information focusing on the cause and severity of low back pain has the  
87 potential to diminish obstacles to physical activity and improve their activity levels [19,49]. However,  
88 insufficient reporting on material development limits the understanding of the effectiveness and key  
89 mechanism of the current informational resources [19,59].

90  
91 *Choosing Wisely* is a healthcare campaign aimed at encouraging healthcare professionals and patients to  
92 make informed and evidence-based decisions about medical tests and treatments [23,40]. It promotes the  
93 idea of using healthcare resources wisely by avoiding unnecessary or low-value care and facilitate evidence  
94 based-decision making [40]. Previous *Choosing Wisely* campaigns have shown mixed effectiveness, in terms  
95 of clinical decision support and imaging usage [7]; most interventions focus solely on clinicians, despite that  
96 imaging requests frequently originate from patients [23,41,55]. This emphasizes the importance of  
97 targeting both patients and clinicians in co-creation processes to ensure that the materials meet their  
98 needs and address key outcomes, such as information relevance, clarity, and patient satisfaction [45,57,58].

99  
100 The objective of this study is to co-create an information resource in the form of a leaflet that can be  
101 distributed in clinical settings, websites, and social media, targeting individuals experiencing low back pain.  
102 The purpose of the leaflet is to serve as a conversation tool between patients, relatives, and clinicians  
103 during consultations, aiming to reduce the use of imaging diagnostics (MRI or X-ray), when there is no  
104 clinical suspicion of serious illness.

## 105 106 Methods

107 This project was led by a steering group (CD, LL, MDL, MB, MSR) with input from a project group (EO, KDL,  
108 MH, JBL, MKB, BE, NP). Additionally, the steering group received ongoing input from practice consultants  
109 (licensed healthcare professionals currently working with people experiencing low back pain in clinical  
110 practice) in the North Denmark Region throughout the process. This multiple-method study employed an  
111 iterative process conducted in four stages (Figure 1):

112  
113  
114  
115  
116  
117  
118  
119  
120  
121

- 1) Systematic literature search aimed to answer; “*which information needs to be included in a leaflet for people experiencing low back pain?*”;
- 2) Input from practice consultants to explore: “*the needs of clinical practice, what is considered important in a leaflet, and what information should be covered?*”;
- 3) Development of a program theory to support the *Choosing Wisely* leaflet, and co-creation of the information resource (*Choosing Wisely* leaflet),
- 4) Think-aloud interviews with adults experiencing low back pain that aimed to understand end-users’ perspectives regarding the leaflet.

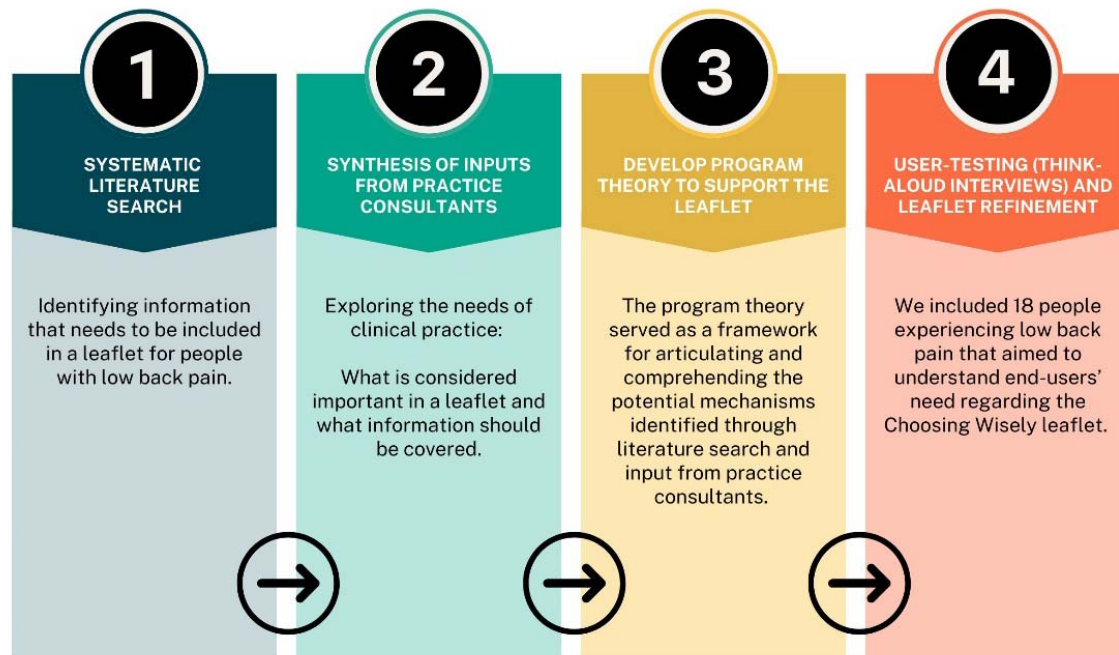

122  
123  
124  
125  
126  
127  
128  
129  
130  
131  
132

**Figure 1** – The iterative process conducted in four stages. This multiple-method study used an iterative process conducted in four stages, followed by consensus meetings within the steering group with representation of members from the project group.

Each of the four stages was followed by consensus meetings in the steering group with representation of members from the project group, which through an iterative process developed and designed the leaflet based on the generated knowledge. North Denmark Region Committee on Health Research Ethics determined that this study was exempt from ethical approval because of its non-interventional design. Signed informed consent was obtained from all participants during the think-aloud interviews. All data were stored on a local secure fileshare hosted at Aalborg University and the North Denmark Region.

### Stage 1- Synthesis of inputs from the literature search

#### **Search strategy and study eligibility.**

133  
134  
135  
136  
137  
138  
139  
140  
141  
142

In May 2023, three researchers (CD, BE, and MSR) independently identified studies (qualitative and quantitative) published between 2000 and May 2023. Eligible studies were those focusing on information needed by adults to understand low back pain, defined according to the chronic primary musculoskeletal pain criteria outlined by Nicholas et al 2019 [47]. We searched MEDLINE (via PubMed). The search strategy was initially designed by CD in collaboration with MSR, and revisions and edits to the content were provided before being validated among all members in the project group. Search terms related to education and information needs were combined with low back pain in the search strategy (appendix 1).

143 *Data analysis*

144 Relevant references were exported to Microsoft Excel 365 via PubMed, before independently selected  
145 (title/abstract) by CD, BE, and MSR. We used information from all included articles, such as qualitative  
146 statements and quantitative findings, to form the basis for the content and structure of the programme  
147 theory and *Choosing Wisely* leaflet. We summarized the main overall findings in a brief narrative summary  
148 that was discussed and agreed upon at a consensus meeting within the project group before developing  
149 the programme theory (appendix 2).

150

151 **Stage 2 – Synthesis of inputs from practice consultants**

152 The aim of this stage was to explore the needs and preferences from clinical practice. We included (n=5)  
153 practice consultants (a general practitioner, a physiotherapist, a chiropractor, a rheumatologist, and a  
154 neurosurgeon) that provided input to the development of the *Choosing Wisely* leaflet based on their clinical  
155 expertise. These consultants were recruited from general practitioner clinics and medical networks in the  
156 North Denmark Region to ensure diverse representation. Their involvement was facilitated through written  
157 email communication including questions such as “How should a leaflet look to assist your clinical  
158 practice?”. Additionally, some shared references to illustrate their point [15].

159

160 *Data analysis*

161 The practice consultants’ responses were extracted into Microsoft Word 365. Each response was read by  
162 JBL and MKB, and findings were synthesized into a narrative summary. This summary was then discussed  
163 and agreed upon during a consensus meeting with all involved parties (appendix 3). These detailed  
164 perspectives were used to inform the refinement and improvement of the *Choosing Wisely* leaflet's content  
165 and usability.

166

167 **Stage 3 - Development of a program theory to support the *Choosing Wisely* leaflet.**

168 We used the findings from the literature search and synthesis of inputs from practice consultants to  
169 construct a program theory. The program theory served as a framework for articulating and  
170 comprehending the underlying mechanisms identified through literature search and input from practice  
171 consultants and was structured in six subheadings as described by Kazi et al [36]: Target group (context);  
172 Activities; Effective mechanisms (mechanisms); Short-term outcome; Medium-term outcome; Long-term  
173 outcomes (appendix 4). MSR and SKJ synthesized the findings into a structured programme theory before  
174 presenting it to the steering and project group. The theory was subsequently iteratively agreed upon at a  
175 consensus meeting. This process ensured that the program theory accurately reflected the synthesized  
176 information and received input and endorsement from relevant stakeholders before progressing further.

177

178 We created the initial draft of the *Choosing Wisely* leaflet using the identified potential pathways and  
179 mechanisms expected to drive the leaflet’s intended outcomes. Additionally, we extracted information  
180 from existing leaflets found through searches on PubMed, Google, and Google Scholar [23,31]. The content  
181 was designed using a second person perspective, employing simple language and an informal tone, such as  
182 "it is rarely necessary for you to undergo scanning...", to boost relatability. Any disparities were addressed  
183 through discussions and reached a consensus among the members in the steering and project group prior  
184 to initiating stage 4.

185

186 **Stage 4 - Think-aloud interviews (User testing) and refinement of the *Choosing Wisely* leaflet.**

187 We employed individual qualitative think-aloud interviews, to actively engage end-users in the  
188 development process through user testing [5,29]. The think-aloud method offers a simulation-based  
189 approach to understanding end-users’ perceptions, interactions, reasoning processes, and latent challenges  
190 associated with using the *Choosing Wisely* leaflet [5,29]. This qualitative design approach was divided into  
191 four separate sessions to ensure iterative refinement of the end-users’ perspectives, aligning it with the  
192 needs and preferences of people experiencing low back pain. It involved iterative refinement of the design

193 based on the acquired knowledge [5,29]. All demographic data was collected via Research Electronic Data  
194 Capture (REDCap™) [25].

195

196 *End-user involvement: People experiencing low back pain.*

197 Participants experiencing low back pain were recruited by convenience sampling using the practice  
198 consultant' clinics in the North Denmark Region, and social media posts via Facebook. We included adults  
199 experiencing low back pain, ≥18 years old, and able to speak and read Danish. We decided to divide the  
200 interviews into separate sessions with at least five adults in each session to ensure a variety of perspectives  
201 [5,29]. We included six participants for each of the four sessions to achieve sufficient information power in  
202 the iterations [16,44]. The interview guide was first pilot tested internally within the author group, and  
203 subsequently with two individuals experiencing low back pain prior to the first interview (appendix 5) [33].  
204 Prior to the interview participants with low back pain completed a demographic questionnaire, including  
205 items on gender, age, current low back pain (yes/no), physical activity, pain medication, low back pain  
206 duration, and pain in other body locations (appendix 6). All interviews took place online via Microsoft  
207 Teams and were video recorded. Participants were instructed to describe their thoughts as they occurred,  
208 saying what came to mind as they went through the *Choosing Wisely* leaflet [5]. MDL reminded the  
209 participants to keep talking if they fell silent, by using prompts such as "*What are you thinking of right*  
210 *now*", or "*You are not saying anything right now?*". The aim of the think-aloud interviews was to pinpoint  
211 any disparities between the participants' interpretation of the text and its intended meaning. Additionally,  
212 MDL gathered field notes during the interviews that were later refined by reviewing the video recordings to  
213 ensure that emerging, relevant insights were identified post-hoc and addressed in the following interviews  
214 [5,29].

215

216 *Data analysis – Iterative revisions*

217 All changes to the *Choosing Wisely* leaflet was based on re-watching the video, notes, and transcriptions.  
218 All online interviews were transcribed non-verbatim to retain their meaning, as our goal was to focus on  
219 identifying comprehension issues as well as additional suggestions, and we did not plan to undertake an  
220 extensive thematic analysis [22,37]. After the first think-aloud session, revisions were collectively decided  
221 upon during a steering group meeting, informed by interview data, prior to moving on to the next think-  
222 aloud session. This iterative process continued until suggestions for revisions were minimized, as  
223 recommended [5,29]. The practice consultants had the opportunity to provide feedback before the first  
224 session and after the last session. The insights gained from the previous steps informed the design choices  
225 made during the modulation of the leaflet in each round. This ensured that the final leaflet was both user-  
226 friendly and aligned with the needs identified through program theory, user feedback, and expert input.

227

## 228 **Results**

229 *Summary of the systematic search.*

230 The literature search emphasized that individuals with low back pain need clear and consistent information  
231 about the diagnosis, treatment options, prognosis, and self-management strategies, delivered in calming  
232 and reassuring terms (appendix 2).

233 *Synthesis of the practice consultants.*

234 The practice consultants emphasized a focus on providing understandable information about low back pain,  
235 self-management strategies, and treatment options to reduce the proportion of MRI scans. It was  
236 recommended that the leaflet targeted people who were at risk of poor prognosis, such as having negative  
237 thoughts about low back pain and its management. Furthermore, it was highlighted that the leaflet should  
238 be designed to be distributed by healthcare professionals with additional explanations, made available  
239 online, and possibly supplemented with QR codes linking to other materials, such as informational videos.

240 Lastly, it was emphasized that the leaflet was kept concise, with a maximum of two pages, to ensure easy  
 241 comprehension of key points and to fit within the consultation.

242

243 *Program theory and development of the Choosing Wisely leaflet.*

244 The program theory identified potential mechanisms guiding the structure, development, and  
 245 implementation of the leaflet. This involved addressing patient concerns, reducing diagnostic uncertainty,  
 246 providing decision support, offering insights into management options, and overcoming barriers such as  
 247 patient insistence on imaging diagnostics. Short-term outcomes included reduced diagnostic uncertainty,  
 248 patient reassurance, reduction of anxiety, and validating the experience, while medium-term outcomes  
 249 focused on reducing both diagnostic uncertainty and physician's fear of making mistakes, often leading to  
 250 the practice of defensive medicine. Long-term outcomes encompassed decreased unnecessary imaging  
 251 diagnostics, cost reduction, increased patient satisfaction, and clinicians improved understanding of  
 252 integrating informational materials into patient care.

253

254 **Stage 4 – End-user testing: Think-aloud interviews.**

255 We included 18 people experiencing low back pain (six in each session). The median age of participants was  
 256 37, ranging from 20 to 80 years, and 83% were female (Table 1). The duration of the interviews ranged  
 257 from 25 to 39 minutes, with a mean duration of 32 minutes.

258

| ID | NRS (0-100) worst (last week) | NRS (0-100) average (last week) | LBP duration | Pain (other areas) | Gender | Age range | Physical activity | Physical activity (hours a week) | Pain medication | Medication (frequency) |
|----|-------------------------------|---------------------------------|--------------|--------------------|--------|-----------|-------------------|----------------------------------|-----------------|------------------------|
| 1  | 71                            | 37                              | 4 years      | Yes                | Male   | 30-40     | Yes               | 5                                | Yes             | More than once a week  |
| 2  | 41                            | 57                              | 11 years     | Yes                | Female | 40-50     | Yes               | 3                                | Yes             | Daily                  |
| 3  | 75                            | 50                              | 5 years      | Yes                | Female | 60-70     | Yes               | 8                                | Yes             | Monthly                |
| 4  | 29                            | 37                              | 6 months     | Yes                | Female | 20-30     | No                | 0                                | No              | None                   |
| 5  | 77                            | 58                              | 18 years     | Yes                | Female | 40-50     | Yes               | 2                                | Yes             | Monthly                |
| 6  | 65                            | 49                              | 30 years     | Yes                | Female | 70-80     | Yes               | 5                                | Yes             | Daily                  |
| 7  | 27                            | 27                              | 20 years     | Yes                | Female | 60-70     | Yes               | 3                                | Yes             | Daily                  |
| 8  | 67                            | 45                              | 13 years     | Yes                | Female | 30-40     | Yes               | 2                                | Yes             | Daily                  |
| 9  | 32                            | 18                              | 15 years     | Yes                | Female | 50-60     | No                | 0                                | Yes             | Monthly                |
| 10 | 64                            | 34                              | 20 years     | Yes                | Male   | 40-50     | Yes               | 6                                | Yes             | More than once a week  |
| 11 | 17                            | 20                              | 5 years      | Yes                | Female | 60-70     | Yes               | 4                                | No              | None                   |
| 12 | 50                            | 39                              | 8 months     | Yes                | Female | 50-60     | Yes               | 5                                | Yes             | More than once a week  |
| 13 | 50                            | 36                              | 47 years     | Yes                | Female | 50-60     | Yes               | 2                                | No              | None                   |
| 14 | 58                            | 29                              | 18 years     | No                 | Female | 30-40     | No                | 0                                | Yes             | Once a week            |
| 15 | 73                            | 60                              | 25 years     | Yes                | Female | 60-70     | No                | 0                                | Yes             | Daily                  |
| 16 | 66                            | 40                              | 1 year       | Yes                | Female | 60-70     | No                | 0                                | Yes             | Daily                  |
| 17 | 19                            | 10                              | 35 years     | Yes                | Female | 60-70     | Yes               | 5                                | Yes             | Daily                  |
| 18 | 16                            | 17                              | 10 years     | Yes                | Female | 40-50     | Yes               | 7                                | Yes             | Rare                   |

259

260 **Table 1:** Demographic characteristics. NRS (0-100) worst (last week): Numeric Rating Scale score representing the worst pain experienced by  
 261 participants in the past week (0 = no pain, 100 = worst imaginable pain). NRS (0-100) average (last week): Numeric Rating Scale score representing  
 262 the average pain experienced by participants in the past week (0 = no pain, 100 = worst imaginable pain). Pain (other areas): presence of pain in  
 263 areas other than the lower back. Abbreviation: NRS = Numeric Rating Scale. LBP = Low back pain. See appendix 6 for full Research Electronic Data  
 264 Capture (REDCap) questionnaire.

265

266 Most of the changes to the leaflet were made following the first two think-aloud sessions. The primary  
 267 issues were the use of improper language, such as medical terminology, the need for clarification of  
 268 content, and unclear phrasing. This improved the layout and usability with simplified language, visual

269 illustrations, and a focus on practical solutions adjusted to manage low back pain. In the following sessions,  
270 although the reasons for changes remained similar, comprehension issues decreased, while participants  
271 noted an enhanced reading flow. The participants also appreciated the relatable content, such as validation  
272 of their experiences, concerns, and pain-related worries, which reflected their own lived experiences:

273

274 *"I think it is really nice, this here. I must say [...] because I think they're trying to calm down your alarm bells*  
275 *here and guide you a bit, which I think is really nice. It's also something that [my physiotherapist] has*  
276 *worked a lot on with me, 'calm down, we'll get it under control.' So it could well be that we made this one*  
277 *here".*

278

279 Participants mentioned that it was important that the explanations provided reassurance and was easy to  
280 read:

281

282 *"It's extremely easy to read, very accessible [...] I would almost say that if I read it the first time I had back*  
283 *pain, it would be somewhat reassuring, like 'okay, this isn't something dangerous, many people have this.'*  
284 *That's the immediate impression I get from it".*

285

286 This led us to simplify the language and add more explanatory illustrations to make the content more  
287 accessible. It was highlighted that frustration often accompanies dealing with challenging situations,  
288 particularly when it involves uncertainty of causes and not knowing the trajectory of low back pain:

289

290 *"The easiest thing you can do is to start feeling frustrated when you're dealing with something like that [low*  
291 *back pain]. Partly to get it described and so on [...] For example, if it was hanging at the doctor's office when*  
292 *I got there, I would grab it right away".*

293

294 The participants emphasized the importance of information being concise, easy to read, and free of  
295 technical/medical terms, so that it was accessible and understandable without missing key points. Too  
296 much text or complicated words could discourage the reader from engaging with the content:

297

298 *"It is not crammed with too much stuff where you think, 'Oh, I need to read that again because I didn't*  
299 *understand it at all.' There aren't a lot of technical terms or anything like that, so I think it is extremely easy*  
300 *to read, it is very accessible. And it's not too long either, so you don't only get halfway through and then*  
301 *can't read the rest."*

302

303 *Refinement and co-creation of the Choosing Wisely leaflet.*

304 The *Choosing Wisely* leaflet was developed over the course of six status meetings in the steering group and  
305 subsequently approved among all members in the project group (Figure 2). In total, we made 95 changes as  
306 a result of input from think-aloud interviews from the first version of the leaflet to the last version.

307

308 The leaflet consists of four sections allocated on an A4 page that is folded in the middle. It includes figures  
309 and various colours to illustrate the content. Additionally, the leaflet contains a QR code that links to a  
310 webpage with online/digital versions of the leaflet. This webpage includes detailed information and needs  
311 regarding low back pain that were identified during the think aloud interviews, supplementing the content  
312 of the *Choosing Wisely* leaflet.



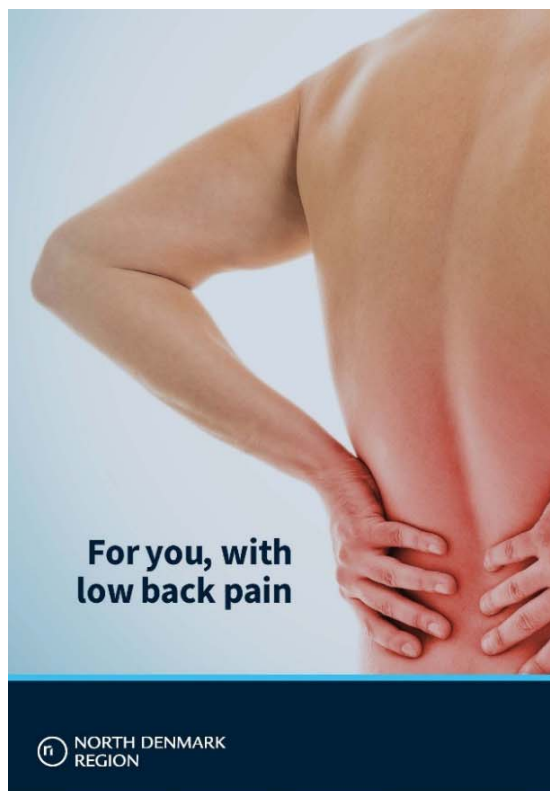

### Low back pain is most often a harmless condition

4 out of 5 people will have low back pain at some point in their life. While most people notice that their back pain improves within the first weeks, low back pain can persist for many months. During this time the pain can vary, with periods of improvement and flare-ups.

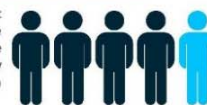

Sometimes, the pain is so intense, that it feels like there is something seriously wrong. It may stop you from doing what you enjoy. Even so, this does not mean that there is damage to your body or that you have a serious illness. In most cases – 99 out of 100 – the reasons for the pain cannot be explained by serious causes or physical changes to the body.

### There is rarely a need for a scan

Your general practitioner, chiropractor or physiotherapist can rule out serious causes of your pain based on your medical history and a physical examination. MRI scans or X-rays are rarely needed. These tests cannot explain why you have pain nor guide which treatment you should receive.

### Causes and opportunities for treatment

Low back or back pain can happen for lots of reasons - and often from a mixture of reasons. It is often difficult to establish the specific causes of low back pain, so it can be difficult to figure out exactly why you have pain. We know that not enough physical activity, poor sleep, and your mental health can contribute to maintaining the pain. Because pain is so individual and complex, no single intervention or treatment, such as pain medication, procedure, or exercise, is likely to completely cure your back pain. Although we know that it can be a frustrating and difficult situation that interrupts your life, there are some things that you can do about it.

For most people the most helpful thing to do is to keep moving, even small amounts at first. Below are so things to try:

- Add some physical activity or exercise into your daily routine, such as going for a walk or doing some exercises that you feel comfortable doing
- Make adjustments to your work and everyday activities, in order for you to be able to practice them even during painful periods

Getting to know your pain can also help you. This means that you might need to try more than one thing to figure out what works best for you. Once you learn how to manage your pain flare-ups, you will be able to keep up some activity even during painful periods. If you need help to get started, you can contact a health professional, e.g. your general practitioner, a physiotherapist, or a chiropractor.

### Receive help to maintain as normal a weekday as possible

Low back pain affects people differently. For some people the pain may interrupt their sleep, their work capacity, their mood, or a combination of these. The pain can be so strong that it leads to major changes in their way of life. For example, some people cannot do the same activities that they are used to, or that the pain prevents them from going to work the same way they did before.

If you find yourself in such a situation, it can be beneficial to involve healthcare professionals, e.g. your general practitioner or another healthcare professional. In collaboration, you can find a way to return to a normal life as soon as possible. You may also need extra support from your family and workplace during a painful period. Together, you can find new ways to arrange your day so that you can still be involved, even when you have pain.

### Take control of your pain

The best way to deal with low back pain, is to be active, start with something small that you can manage on your own. Experiment and try to figure out what works for you.

It is important that you get a sense of control of your pain. If you find it difficult to figure out what works for you, seek help from a healthcare professional, e.g. your general practitioner, a physiotherapist, or a chiropractor. Healthcare professionals can answer any questions that you might have to help you to understand your pain and what might be affecting it. They can also give you advice on how to ease your pain and improve your everyday-living. This advice might be in relation to:

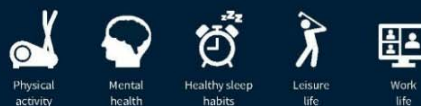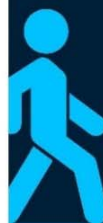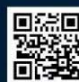

For more ideas on how to prevent low back pain and what you can do during a painful episode scan the QR code or visit the website via <https://m.dk/laenderygsmerter>

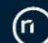

April 2024

313

314  
315  
316

Figure 2. The leaflet is on an A4 page that is folded in the middle. The English version of the *Choosing Wisely* leaflet have not been think aloud tested. Only the Danish version have been revised based on end-user perspectives (Think-aloud interviews). Therefore, the English version of the *Choosing Wisely* leaflet is our translation exclusively.

317 **Discussion**

318 We co-created a new *Choosing Wisely* leaflet aimed at reducing the use of imaging diagnostics in people  
319 with low back pain. Our multi-method study used a program theory to shape the content and design, and  
320 we included end-users to enhance co-creation. The initial version reflected what clinicians and researchers  
321 deemed necessary according to the program theory. However, through iterative user-testing with  
322 individuals who have lived experience of low back pain, the leaflet underwent significant changes in needs,  
323 appearance, and phrasing. This highlighted the importance of balancing theoretical theories with end-user  
324 involvement to create user-friendly health communication materials [13,20,29].

325

326 ***Explanations of findings***

327 ***Involving end users to co-create the Choosing Wisely leaflet.***

328 End-user engagement throughout the process facilitated the identification and mitigation of prevalent  
329 misconceptions regarding low back pain. Recent findings have emphasized the importance individuals place  
330 on understanding the causes of pain, as it may influence perceived management strategies, and needs for  
331 additional examinations [8,11,38,61]. Sharma et al. found that both patients and clinicians consider imaging  
332 useful for identifying the source of non-specific low back pain; patients viewing pathological findings as  
333 validation of their pain's legitimacy [55]. Patients often seek imaging for low back pain due to the belief  
334 that it will diagnose their condition; however, they may not fully grasp the risks and harms associated with  
335 unnecessary imaging, such as increased uncertainty and invalidation of their pain [3,8,52,55]. It appears  
336 that people with low back pain resort to social media for validation [50], suggesting that clinician advice or  
337 explanations might not be resonating as intended [54]. Distilling these types of messages into scalable  
338 resources that can be widely distributed seems necessary to counteract the prevalent unhelpful messages  
339 about low back pain and reduce diagnostic uncertainty [30,31,55]. We implemented 95 modifications  
340 during the user-test which emphasizes the challenge and importance of developing structured health  
341 information aligned with the perceived needs and comprehension of the target audience.

342

343 ***Defensive medicine.***

344 Defensive medicine is widespread and needs system wide changes. The drivers of defensive medicine are  
345 complex and include both assurance and avoidance behaviors; these practices have significant implications  
346 for healthcare systems, such as increased costs and potential harms through overdiagnosis and  
347 overtreatment [32,51,52]. This includes unnecessary tests or procedures to reassure patients or protect  
348 against the risk of legal action [32,51,52]. Clinicians may feel pressured by patients or their relatives to  
349 order imaging, particularly when they lack confidence or experience, or when they wish to meet the  
350 expectations [3,52]. However, clinical factors such as patient-clinician collaboration may contribute to  
351 reduced overuse of imaging [3,52]. This combination of patient expectations and systemic or organizational  
352 pressures can lead to unnecessary imaging that may not improve patient outcomes [12,21,30,52]. The  
353 informational *Choosing Wisely* leaflet has the potential to align patient expectations and clinician beliefs  
354 regarding appropriate low back pain care, potentially mitigating defensive medicine practices [30,39].  
355 Future studies should investigate the leaflet's effectiveness on imaging utilization rates.

356

357 ***Implementing evidence-based strategies.***

358 Healthcare systems need to adopt strategies that enhance implementation of evidence-based practices and  
359 guidelines to reduce treatment overuse [3,21,52]. However, implementing guidelines in complex healthcare  
360 settings is challenging because of its multiple implications, such as individual patient needs, administrative  
361 processes, and the different clinical environments [46]. Effective implementation, particularly clinician-  
362 focused and multicomponent strategies, is crucial for integrating *Choosing Wisely* guidelines into clinical  
363 settings [7]. Despite the benefits of informational resources, usage in clinical practice is low due to barriers,  
364 such as lack of funding, implementation mechanisms (i.e., context-specific needs), and support from  
365 healthcare professionals/settings [19,59]. Key facilitators include online/digital delivery, co-creation with  
366 patients, cross-sectorial collaborations, clinician training and awareness, and leadership support [19,59,60].

367 Therefore, we gathered a cross-sectoral group with interdisciplinary representation, engaged end-users,  
368 and implemented online delivery via QR code to address some of these potential implementation barriers.  
369 Furthermore, we developed an accompanying guide (i.e., 'help text') intended to support the use of the  
370 leaflet. Our intent was to create a supportive clinical environment with multiple (digital) delivery options,  
371 that encourage the use of the *Choosing Wisely* leaflet [19,23,30,39].  
372

373 Current information resources often lack sufficient details on material development and structure; this  
374 heterogeneity, combined with the varying extent of the materials, may influence their adherence and  
375 effectiveness [19]. In our study, participants preferred a concise and easy-to-read leaflet. Clinicians  
376 emphasized that it should be limited to two pages to enhance usability, clarity, and practicality. People with  
377 low back pain underscored the need for the leaflet to present information clearly and comprehensively  
378 while being concise and not too long. Key points should be highlighted and not overlooked, ensuring that  
379 the leaflet does not overwhelm or discourage engagement with the content. Future research should focus  
380 on evaluating the effectiveness of this *Choosing Wisely* leaflet in real-world settings, using validated  
381 outcome measures and qualitative approaches. This could involve assessing its usage in clinical settings and  
382 its impact on the accuracy of imaging diagnostics, perceived diagnostic uncertainty, improved patient  
383 knowledge, beliefs, satisfaction, and adherence to the recommended treatment guidelines.  
384

#### 385 **Implications.**

386 Healthcare campaigns, such as *Choosing Wisely*, play a vital role in promoting evidence-based decision-  
387 making, by promoting evidence-based guidelines, fostering patient engagement, and raising awareness  
388 among healthcare professionals at an organizational level [7,34,56]. The *Choosing Wisely* leaflet is portable  
389 and could be used by clinicians to remind and reinforce information discussed during clinical encounters to  
390 support patients understanding their diagnosis and optimizing the decision-making. It includes pictures  
391 recommended to help patients and consumers understand what is being communicated [54]. The *Choosing*  
392 *Wisely* leaflet is not a decision aid, but an informational resource designed to facilitate clinical discussions  
393 and inform patients about evidence-based management strategies for low back pain.  
394

395 The development process facilitated iterative learning and adaptation. Our findings showed the necessity  
396 for clarity, simplicity, and relatability in patient educational materials. Through the think-aloud interviews,  
397 we implemented significant revisions based on the feedback received, highlighting the importance of  
398 involving individuals with lived experience of low back pain in developing patient materials. This fostered a  
399 deeper understanding of the rationale behind the *Choosing Wisely* leaflet's design choices and its  
400 anticipated impacts, such as reducing diagnostic uncertainty and enhancing imaging accuracy. By  
401 incorporating diverse perspectives and fostering iterative refinement, our methodology may help future  
402 research and clinical settings to optimize their delivery of relevant health information to end-users [14].  
403 These efforts must be sustained and adapted over time to ensure that both patients and clinicians are  
404 equipped to make informed decisions.  
405

#### 406 **Strengths and limitations.**

407 We recruited a convenience sample of people with low back pain. These people may not be representative  
408 of the target population. Similarly, the median age of the cohort was less than the estimated population  
409 prevalence of people with low back pain indicating a potential selection bias [18]. However, by including  
410 the perspective of people across the different age groups enhanced the leaflet's generalisability. One  
411 database was deemed appropriate for reviewing and identifying suitable content for the leaflet. The  
412 purpose was to create a scientific basis from the literature; therefore, we did not conduct a full systematic  
413 review but instead sought evidence-based information from the scientific literature to guide the content of  
414 the programme theory and *Choosing Wisely* leaflet. The inclusion of end-users, such as multidisciplinary  
415 practice consultants and people with the lived experience of low back pain ensured a comprehensive  
416 understanding of the context-specific practical needs and perspectives relevant to the leaflet's

417 development. This iterative approach allowed for a structured and efficient exchange of ideas, enabling  
418 end-users to review the content at their convenience and provide thoughtful, written input with multiple  
419 revisions and adaptations. However, further testing in real-world settings is necessary to ensure the leaflets  
420 efficacy and to identify potential mechanisms that can support both clinicians and patients in evidence-  
421 based decisions.

422

#### 423 **Conclusion**

424 We co-created a patient-facing leaflet that is intended to reduce unnecessary imaging in the management  
425 of low back pain, across healthcare sectors. The leaflet was developed, and refined, through multiple steps  
426 and methods to ensure it aligns with current evidence, local context, and patient needs. This leaflet may  
427 support patient care and outcomes by raising awareness about the harms of the use of imaging, such as  
428 overdiagnosis and overuse. Real-world implementation and outcome assessment are crucial for  
429 understanding the effectiveness, adherence, and potential impact of the *Choosing Wisely* leaflet.

430

431

432 **References**

433

- 434 [1] Abdel Shaheed C, Maher CG, Williams KA, Day R, McLachlan AJ. Efficacy, Tolerability, and Dose-  
435 Dependent Effects of Opioid Analgesics for Low Back Pain: A Systematic Review and Meta-analysis.  
436 JAMA Intern Med 2016;176:958–68.
- 437 [2] Alam R, Cheraghi-Sohi S, Panagioti M, Esmail A, Campbell S, Panagopoulou E. Managing diagnostic  
438 uncertainty in primary care: a systematic critical review. BMC Fam Pract 2017;18:79.
- 439 [3] Blokzijl J, Dodd RH, Copp T, Sharma S, Tcharkhedian E, Klinner C, Maher CG, Traeger AC.  
440 Understanding overuse of diagnostic imaging for patients with low back pain in the Emergency  
441 Department: a qualitative study. Emergency Medicine Journal 2021;38:529.
- 442 [4] Buchbinder R, Underwood M, Hartvigsen J, Maher CG. The Lancet Series call to action to reduce low  
443 value care for low back pain: an update. Pain 2020;161:S57–S64.
- 444 [5] Burbach B, Barnason S, Thompson SA. Using “Think Aloud” to Capture Clinical Reasoning during  
445 Patient Simulation. 2015;12:1–7.
- 446 [6] Cashin AG, Folly T, Bagg MK, Wewege MA, Jones MD, Ferraro MC, Leake HB, Rizzo RRN, Schabrun  
447 SM, Gustin SM, Day R, Williams CM, McAuley JH. Efficacy, acceptability, and safety of muscle  
448 relaxants for adults with non-specific low back pain: systematic review and meta-analysis. BMJ  
449 2021;374:n1446.
- 450 [7] CLIFF BQ, AVANCEÑA ALV, HIRTH RA, LEE SD. The Impact of Choosing Wisely Interventions on  
451 Low-Value Medical Services: A Systematic Review. Milbank Q 2021;99:1024–1058.
- 452 [8] Costa N, Butler P, Dillon M, Mescouto K, Olson R, Forbes R, Setchell J. “I felt uncertain about my  
453 whole future”—a qualitative investigation of people’s experiences of navigating uncertainty when  
454 seeking care for their low back pain. Pain 2023;164:2749–2758.
- 455 [9] Cox CL, Miller BM, Kuhn I, Fritz Z. Diagnostic uncertainty in primary care: what is known about its  
456 communication, and what are the associated ethical issues? Fam Pract 2021;38:654–668.
- 457 [10] Dahm MR, Cattanach W, Williams M, Basseal JM, Gleason K, Crock C. Communication of Diagnostic  
458 Uncertainty in Primary Care and Its Impact on Patient Experience: an Integrative Systematic Review.  
459 J Gen Intern Med 2022.
- 460 [11] Darlow B, Fullen BM, Dean S, Hurley DA, Baxter GD, Dowell A. The association between health care  
461 professional attitudes and beliefs and the attitudes and beliefs, clinical management, and outcomes  
462 of patients with low back pain: A systematic review. European Journal of Pain 2012;16:3–17.
- 463 [12] Deyo RA, Mirza SK, Turner JA, Martin BI. Overtreating chronic back pain: time to back off? J Am  
464 Board Fam Med 2009;22:62–8.
- 465 [13] Dillon EC, Tuzzio L, Madrid S, Olden H, Greenlee RT. Measuring the Impact of Patient-Engaged  
466 Research: How a Methods Workshop Identified Critical Outcomes of Research Engagement. J Patient  
467 Cent Res Rev 2017;4:237–246.
- 468 [14] Djurtoft C, Bruun MK, Riel H, Hoegh MS, Darlow B, Rathleff MS. How do we explain painful  
469 non-traumatic knee conditions to adolescents? A multiple-method study to develop credible  
470 explanations. European Journal of Pain 2023.

- 471 [15] Dragsbæk L, Jensen TS, Arnbak B, Thomsen JL, Axelsen S, Isaksen C, Muff E, Jensen RK. The clinical  
472 relevance of magnetic resonance imaging of the lower back. *Ugeskr Laeger* 2023;185.
- 473 [16] Faulkner L. Beyond the five-user assumption: Benefits of increased sample sizes in usability testing.  
474 *Behavior Research Methods, Instruments, & Computers* 2003;35:379–383.
- 475 [17] Ferreira GE, McLachlan AJ, Lin C-WC, Zadro JR, Abdel-Shaheed C, O’Keeffe M, Maher CG. Efficacy  
476 and safety of antidepressants for the treatment of back pain and osteoarthritis: systematic review  
477 and meta-analysis. *BMJ* 2021;372:m4825.
- 478 [18] Ferreira ML, de Luca K, Haile LM, Steinmetz JD, Culbreth GT, Cross M, Kopec JA, Ferreira PH, Blyth  
479 FM, Buchbinder R, Hartvigsen J, Wu A-M, Safiri S, Woolf AD, Collins GS, Ong KL, Vollset SE, Smith AE,  
480 Cruz JA, Fukutaki KG, Abate SM, Abbasifard M, Abbasi-Kangevari M, Abbasi-Kangevari Z, Abdelalim  
481 A, Abedi A, Abidi H, Adnani QES, Ahmadi A, Akinyemi RO, Alamer AT, Alem AZ, Alimohamadi Y,  
482 Alshehri MA, Alshehri MM, Alzahrani H, Amini S, Amiri S, Amu H, Andrei CL, Andrei T, Antony B,  
483 Arabloo J, Arulappan J, Arumugam A, Ashraf T, Athari SS, Awoke N, Azadnajafabad S, Bärnighausen  
484 TW, Barrero LH, Barrow A, Barzegar A, Bearne LM, Bensenor IM, Berhie AY, Bhandari BB, Bhojaraja  
485 VS, Bijani A, Bodicha BBA, Bolla SR, Brazo-Sayavera J, Briggs AM, Cao C, Charalampous P, Chattu VK,  
486 Cicuttini FM, Clarsen B, Cuschieri S, Dadras O, Dai X, Dandona L, Dandona R, Dehghan A, Demie TGG,  
487 Denova-Gutiérrez E, Dewan SMR, Dharmaratne SD, Dhimal ML, Dhimal M, Diaz D, Didehdar M,  
488 Digesa LE, Diress M, Do HT, Doan LP, Ekholuenetale M, Elhadi M, Eskandarieh S, Faghani S, Fares J,  
489 Fatehizadeh A, Fetensa G, Filip I, Fischer F, Franklin RC, Ganesan B, Gemeda BNB, Getachew ME,  
490 Ghashghaee A, Gill TK, Golechha M, Goleij P, Gupta B, Hafezi-Nejad N, Haj-Mirzaian A, Hamal PK,  
491 Hanif A, Harlianto NI, Hasani H, Hay SI, Hebert JJ, Heidari G, Heidari M, Heidari-Soureshjani R,  
492 Hlongwa MM, Hosseini M-S, Hsiao AK, Iavicoli I, Ibitoye SE, Ilic IM, Ilic MD, Islam SMS, Janodia MD,  
493 Jha RP, Jindal HA, Jonas JB, Kabito GG, Kandel H, Kaur RJ, Keshri VR, Khader YS, Khan EA, Khan MJ,  
494 Khan MAB, Khayat Kashani HR, Khubchandani J, Kim YJ, Kisa A, Klugarová J, Kolahi A-A, Koohestani  
495 HR, Koyanagi A, Kumar GA, Kumar N, Lallukka T, Lasrado S, Lee W-C, Lee YH, Mahmoodpoor A,  
496 Malagón-Rojas JN, Malekpour M-R, Malekzadeh R, Malih N, Mehndiratta MM, Mehrabi Nasab E,  
497 Menezes RG, Mentis A-FA, Mesregah MK, Miller TR, Mirza-Aghazadeh-Attari M, Mobarakabadi M,  
498 Mohammad Y, Mohammadi E, Mohammed S, Mokdad AH, Momtazmanesh S, Monasta L, Moni MA,  
499 Mostafavi E, Murray CJL, Nair TS, Nazari J, Nejadghaderi SA, Neupane S, Neupane Kandel S, Nguyen  
500 CT, Nowroozi A, Okati-Aliabad H, Omer E, Oulhaj A, Owolabi MO, Panda-Jonas S, Pandey A, Park E-K,  
501 Pawar S, Pedersini P, Pereira J, Peres MFP, Petcu I-R, Pourahmadi M, Radfar A, Rahimi-Dehgolan S,  
502 Rahimi-Movaghar V, Rahman M, Rahmani AM, Rajai N, Rao CR, Rashedi V, Rashidi M-M, Ratan ZA,  
503 Rawaf DL, Rawaf S, Renzaho AMN, Rezaei N, Rezaei Z, Roeber L, Ruela G de A, Saddik B, Sahebkar A,  
504 Salehi S, Sanmarchi F, Sepanlou SG, Shahabi S, Shahrokhi S, Shaker E, Shamsi M, Shannawaz M,  
505 Sharma S, Shaygan M, Sheikhi RA, Shetty JK, Shiri R, Shivalli S, Shobeiri P, Sibhat MM, Singh A, Singh  
506 JA, Slater H, Solmi M, Somayaji R, Tan K-K, Thapar R, Tohidast SA, Valadan Tahbaz S, Valizadeh R,  
507 Vasankari TJ, Venketasubramanian N, Vlassov V, Vo B, Wang Y-P, Wiangkham T, Yadav L,  
508 Yadollahpour A, Yahyazadeh Jabbari SH, Yang L, Yazdanpanah F, Yonemoto N, Younis MZ, Zare I,  
509 Zarrintan A, Zoladl M, Vos T, March LM. Global, regional, and national burden of low back pain, its  
510 attributable risk factors, and projections to 2050: a systematic analysis of the Global Burden of  
511 Disease Study 2021. *Lancet Rheumatol* 2023;5:e316–e329.
- 512 [19] Furlong B, Etchegary H, Aubrey-Bassler K, Swab M, Pike A, Hall A. Patient education materials for  
513 non-specific low back pain and sciatica: A systematic review and meta-analysis. *PLoS One*  
514 2022;17:e0274527.

- 515 [20] Greenhalgh T, Hinton L, Finlay T, Macfarlane A, Fahy N, Clyde B, Chant A. Frameworks for supporting  
516 patient and public involvement in research: Systematic review and co-design pilot. *Health*  
517 *Expectations* 2019;22:785–801.
- 518 [21] Gupta P, Gupta M, Koul N. Overdiagnosis and overtreatment; how to deal with too much medicine. *J*  
519 *Family Med Prim Care* 2020;9:3815.
- 520 [22] Halcomb EJ, Davidson PM. Is verbatim transcription of interview data always necessary? *Appl Nurs*  
521 *Res* 2006;19:38–42.
- 522 [23] Hall AM, Aubrey-Bassler K, Thorne B, Maher CG. Do not routinely offer imaging for uncomplicated  
523 low back pain. *BMJ* 2021:n291.
- 524 [24] Harris IA, Traeger A, Stanford R, Maher CG, Buchbinder R. Lumbar spine fusion: what is the  
525 evidence? *Intern Med J* 2018;48:1430–1434.
- 526 [25] Harris PA, Taylor R, Minor BL, Elliott V, Fernandez M, O’Neal L, McLeod L, Delacqua G, Delacqua F,  
527 Kirby J, Duda SN, REDCap Consortium. The REDCap consortium: Building an international community  
528 of software platform partners. *J Biomed Inform* 2019;95:103208.
- 529 [26] Hassan S, Nesovic K, Babineau J, Furlan AD, Kumbhare D, Carlesso LC. Identifying chronic low back  
530 pain phenotypic domains and characteristics accounting for individual variation: a systematic  
531 review. *Pain* 2023;164:2148–2190.
- 532 [27] Hodges PW, Setchell J, Daniel E, Fowler M, Lee AS, Popovich Jr. JM, Cholewicki J. How Individuals  
533 With Low Back Pain Conceptualize Their Condition: A Collaborative Modeling Approach. *J Pain*  
534 2022;23:1060–1070. doi:10.1016/j.jpain.2021.12.014.
- 535 [28] Jarvik JG, Gold LS, Comstock BA, Heagerty PJ, Rundell SD, Turner JA, Avins AL, Bauer Z, Bresnahan  
536 BW, Friedly JL, James K, Kessler L, Nedeljkovic SS, Nerenz DR, Shi X, Sullivan SD, Chan L, Schwalb JM,  
537 Deyo RA. Association of early imaging for back pain with clinical outcomes in older adults. *JAMA*  
538 2015;313:1143–53.
- 539 [29] Jaspers MWM, Steen T, Bos C van den, Geenen M. The think aloud method: a guide to user interface  
540 design. *Int J Med Inform* 2004;73:781–795.
- 541 [30] Jenkins HJ, Downie AS, Maher CG, Moloney NA, Magnussen JS, Hancock MJ. Imaging for low back  
542 pain: is clinical use consistent with guidelines? A systematic review and meta-analysis. *Spine J*  
543 2018;18:2266–2277.
- 544 [31] Jenkins HJ, Moloney NA, French SD, Maher CG, Dear BF, Magnussen JS, Hancock MJ. Using  
545 behaviour change theory and preliminary testing to develop an implementation intervention to  
546 reduce imaging for low back pain. *BMC Health Serv Res* 2018;18:734.
- 547 [32] Kakemam E, Arab-Zozani M, Raeissi P, Albelbeisi AH. The occurrence, types, reasons, and mitigation  
548 strategies of defensive medicine among physicians: a scoping review. *BMC Health Serv Res*  
549 2022;22:800.
- 550 [33] Kallio H, Pietilä A-M, Johnson M, Kangasniemi M. Systematic methodological review: developing a  
551 framework for a qualitative semi-structured interview guide. *J Adv Nurs* 2016;72:2954–2965.

- 552 [34] Karran EL, Grant AR, Lee H, Kamper SJ, Williams CM, Wiles LK, Shala R, Poddar C V., Astill T, Moseley  
553 GL. Do health education initiatives assist socioeconomically disadvantaged populations? A  
554 systematic review and meta-analyses. *BMC Public Health* 2023;23:453.
- 555 [35] Karran EL, Grant AR, Moseley GL. Low back pain and the social determinants of health: a systematic  
556 review and narrative synthesis. *Pain* 2020;161.
- 557 [36] Kazi MAF, Spurling LJ. Realist evaluation for evidence-based practice. European Evaluation Society  
558 4th Annual Conference. Citeseer, 2000.
- 559 [37] Kvale S, Brinkmann S. Interviews: learning the craft of qualitative research interviewing. 3. edition.  
560 Thousand Oaks, Calif.: Sage Publications, 2015.
- 561 [38] Leake HB, Moseley GL, Stanton TR, O’Hagan ET, Heathcote LC. What do patients value learning  
562 about pain? A mixed-methods survey on the relevance of target concepts after pain science  
563 education. *Pain* 2021;162:2558–2568.
- 564 [39] Lemmers GPG, van Lankveld W, Westert GP, van der Wees PJ, Staal JB. Imaging versus no imaging  
565 for low back pain: a systematic review, measuring costs, healthcare utilization and absence from  
566 work. *Eur Spine J* 2019;28:937–950.
- 567 [40] Levinson W, Kallewaard M, Bhatia RS, Wolfson D, Shortt S, Kerr EA. ‘Choosing Wisely’: a growing  
568 international campaign. *BMJ Qual Saf* 2015;24:167–174.
- 569 [41] Lim YZ, Chou L, Au RT, Seneviwickrama KMD, Cicuttini FM, Briggs AM, Sullivan K, Urquhart DM,  
570 Wluka AE. People with low back pain want clear, consistent and personalised information on  
571 prognosis, treatment options and self-management strategies: a systematic review. *J Physiother*  
572 2019;65:124–135.
- 573 [42] Lin I, Wiles L, Waller R, Goucke R, Nagree Y, Gibberd M, Straker L, Maher CG, O’Sullivan PPB. What  
574 does best practice care for musculoskeletal pain look like? Eleven consistent recommendations from  
575 high-quality clinical practice guidelines: systematic review. *Br J Sports Med* 2020;54:79.
- 576 [43] Lyng KD, Djurtoft C, Bruun MK, Christensen MN, Lauritsen RE, Larsen JB, Birnie KA, Stinson J, Hoegh  
577 MS, Palsson TS, Olesen AE, Arendt-Nielsen L, Ehlers LH, Fonager K, Jensen MB, Würtzen H, Poulin  
578 PA, Handberg G, Ziegler C, Moeller LB, Olsen J, Heise L, Rathleff MS. What is known and what is still  
579 unknown within chronic musculoskeletal pain? A systematic evidence and gap map. *Pain* 2023.
- 580 [44] Malterud K, Siersma VD, Guassora AD. Sample Size in Qualitative Interview Studies: Guided by  
581 Information Power. *Qual Health Res* 2015;26:1753–1760.
- 582 [45] McGill B, Corbett L, Grunseit AC, Irving M, O’Hara BJ. Co-Produce, Co-Design, Co-Create, or Co-  
583 Construct—Who Does It and How Is It Done in Chronic Disease Prevention? A Scoping Review.  
584 *Healthcare* 2022;10:647.
- 585 [46] Ng W, Slater H, Starcevich C, Wright A, Mitchell T, Beales D. Barriers and enablers influencing  
586 healthcare professionals’ adoption of a biopsychosocial approach to musculoskeletal pain: a  
587 systematic review and qualitative evidence synthesis. *Pain* 2021;162:2154–2185.
- 588 [47] Nicholas M, Vlaeyen JWS, Rief W, Barke A, Aziz Q, Benoliel R, Cohen M, Evers S, Giamberardino MA,  
589 Goebel A, Korwisi B, Perrot S, Svensson P, Wang S-J, Treede R-D, IASP Taskforce for the Classification



- 590 of Chronic Pain. The IASP classification of chronic pain for ICD-11: chronic primary pain. *Pain*  
591 2019;160:28–37.
- 592 [48] Nury E, Schmucker C, Nagavci B, Motschall E, Nitschke K, Schulte E, Wegwarth O, Meerpohl JJ.  
593 Efficacy and safety of strong opioids for chronic noncancer pain and chronic low back pain: a  
594 systematic review and meta-analyses. *Pain* 2022;163:610–636.
- 595 [49] O’Hagan ET, Di Pietro F, Traeger AC, Cashin AG, Hodges PW, Wand BM, O’Neill S, Schabrun SM,  
596 Harris IA, McAuley JH. What messages predict intention to self-manage low back pain? A study of  
597 attitudes towards patient education. *Pain* 2022;163:1489–1496.
- 598 [50] O’Hagan ET, Traeger AC, Bunzli S, Leake HB, Schabrun SM, Wand BM, O’Neill S, Harris IA, McAuley  
599 JH. What do people post on social media relative to low back pain? A content analysis of Australian  
600 data. *Musculoskelet Sci Pract* 2021;54:102402.
- 601 [51] O’Sullivan JW, Albasri A, Nicholson BD, Perera R, Aronson JK, Roberts N, Heneghan C. Overtesting  
602 and undertesting in primary care: a systematic review and meta-analysis. *BMJ Open*  
603 2018;8:e018557.
- 604 [52] Rozbroj T, Haas R, O’Connor D, Carter SM, McCaffery K, Thomas R, Donovan J, Buchbinder R. How do  
605 people understand overtesting and overdiagnosis? Systematic review and meta-synthesis of  
606 qualitative research. *Soc Sci Med* 2021;285:114255.
- 607 [53] Sajid IM, Parkunan A, Frost K. Unintended consequences: quantifying the benefits, iatrogenic harms  
608 and downstream cascade costs of musculoskeletal MRI in UK primary care. *BMJ Open Qual* 2021;10.
- 609 [54] Schubbe D, Scalia P, Yen RW, Saunders CH, Cohen S, Elwyn G, van den Muijsenbergh M, Durand M-  
610 A. Using pictures to convey health information: A systematic review and meta-analysis of the effects  
611 on patient and consumer health behaviors and outcomes. *Patient Educ Couns* 2020;103:1935–1960.
- 612 [55] Sharma S, Traeger AC, Reed B, Hamilton M, O’Connor DA, Hoffmann TC, Bonner C, Buchbinder R,  
613 Maher CG. Clinician and patient beliefs about diagnostic imaging for low back pain: a systematic  
614 qualitative evidence synthesis. *BMJ Open* 2020;10:e037820.
- 615 [56] Sharma S, Traeger AC, Tcharkhedian E, Harrison J, Hersch JK, Pickles K, Harris IA, Maher CG. “I would  
616 not go to him”: Focus groups exploring community responses to a public health campaign aimed at  
617 reducing unnecessary diagnostic imaging of low back pain. *Health Expect* 2021;24:648–658.
- 618 [57] Slattery P, Saeri AK, Bragge P. Research co-design in health: a rapid overview of reviews. *Health Res*  
619 *Policy Syst* 2020;18:17.
- 620 [58] Smith F, Wallengren C, Öhlén J. Participatory design in education materials in a health care context.  
621 *Action Research* 2017;15:310–336.
- 622 [59] Stacey D, Lewis KB, Smith M, Carley M, Volk R, Douglas EE, Pacheco-Brousseau L, FINDERUP J,  
623 Gundersen J, Barry MJ, Bennett CL, Bravo P, Steffensen K, Gogovor A, Graham ID, Kelly SE, Légaré F,  
624 Sondergaard H, Thomson R, Trenaman L, Trevena L. Decision aids for people facing health treatment  
625 or screening decisions. *Cochrane Database Syst Rev* 2024;1:CD001431.
- 626 [60] Svendsen MJ, Wood KW, Kyle J, Cooper K, Rasmussen CDN, Sandal LF, Stochkendahl MJ, Mair FS,  
627 Nicholl BI. Barriers and facilitators to patient uptake and utilisation of digital interventions for the

- 628 self-management of low back pain: a systematic review of qualitative studies. *BMJ Open*  
629 2020;10:e038800.
- 630 [61] Toye F, Belton J, Hannink E, Seers K, Barker K. A Healing Journey with Chronic Pain: A Meta-  
631 Ethnography Synthesizing 195 Qualitative Studies. *Pain Medicine* 2021;22:1333–1344.
- 632 [62] WHO guideline for non-surgical management of chronic primary low back pain in adults in primary  
633 and community care settings. Geneva: World Health Organization; 2023. Licence: CC BY-NC-SA 3.0  
634 IGO. 978th-92nd-4th-008178–9th ed. © World Health Organization 2023, 2023.
- 635

## Low back pain is most often a harmless condition

4 out of 5 people will have low back pain at some point in their life. While most people notice that their back pain improves within the first weeks, low back pain can persist for many months. During this time the pain can vary, with periods of improvement and flare-ups.

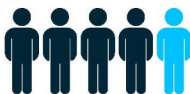

Sometimes, the pain is so intense, that it feels like there is something seriously wrong. It may stop you from doing what you enjoy. Even so, this does not mean that there is damage to your body or that you have a serious illness. In most cases – 99 out of 100 – the reasons for the pain cannot be explained by serious causes or physical changes to the body.

## There is rarely a need for a scan

Your general practitioner, chiropractor or physiotherapist can rule out serious causes of your pain based on your medical history and a physical examination. MRI scans or X-rays are rarely needed. These tests cannot explain why you have pain nor guide which treatment you should receive.

## Causes and opportunities for treatment

Low back or back pain can happen for lots of reasons – and often from a mixture of reasons. It is often difficult to establish the specific causes of low back pain, so it can be difficult to figure out exactly why you have pain. We know that not enough physical activity, poor sleep, and your mental health can contribute to maintaining the pain. Because pain is so individual and complex, no single intervention or treatment, such as pain medication, procedure, or exercise, is likely to completely cure your back pain. Although we know that it can be a frustrating and difficult situation that interrupts your life, there are some things that you can do about it.

## For you, with low back pain

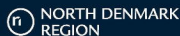

For most people the most helpful thing to do is to keep moving, even small amounts at first. Below are so things to try:

- Add some physical activity or exercise into your daily routine, such as going for a walk or doing some exercises that you feel comfortable doing
- Make adjustments to your work and everyday activities, in order for you to be able to practice them even during painful periods

Getting to know your pain can also help you. This means that you might need to try more than one thing to figure out what works best for you. Once you learn how to manage your pain flare-ups, you will be able to keep up some activity even during painful periods. If you need help to get started, you can contact a health professional, e.g. your general practitioner, a physiotherapist, or a chiropractor.

## Receive help to maintain as normal a weekday as possible

Low back pain affects people differently. For some people the pain may interrupt their sleep, their work capacity, their mood, or a combination of these. The pain can be so strong that it leads to major changes in their way of life. For example, some people cannot do the same activities that they are used to, or that the pain prevents them from going to work the same way they did before.

If you find yourself in such a situation, it can be beneficial to involve healthcare professionals, e.g. your general practitioner or another healthcare professional. In collaboration, you can find a way to return to a normal life as soon as possible. You may also need extra support from your family and workplace during a painful period. Together, you can find new ways to arrange your day so that you can still be involved, even when you have pain.

## Take control of your pain

The best way to deal with low back pain, is to be active, start with something small that you can manage on your own. Experiment and try to figure out what works for you.

It is important that you get a sense of control of your pain. If you find it difficult to figure out what works for you, seek help from a healthcare professional, e.g. your general practitioner, a physiotherapist, or a chiropractor.

Healthcare professionals can answer any questions that you might have to help you to understand your pain and what might be affecting it. They can also give you advice on how to ease your pain and improve your everyday living. This advice might be in relation to:

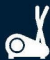

Physical activity

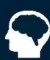

Mental health

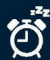

Healthy sleep habits

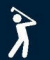

Leisure life

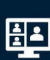

Work life

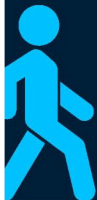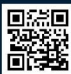

For more ideas on how to prevent low back pain and what you can do during a painful episode scan the QR code or visit the website via <https://ri.dk/laenderygsmert>

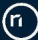

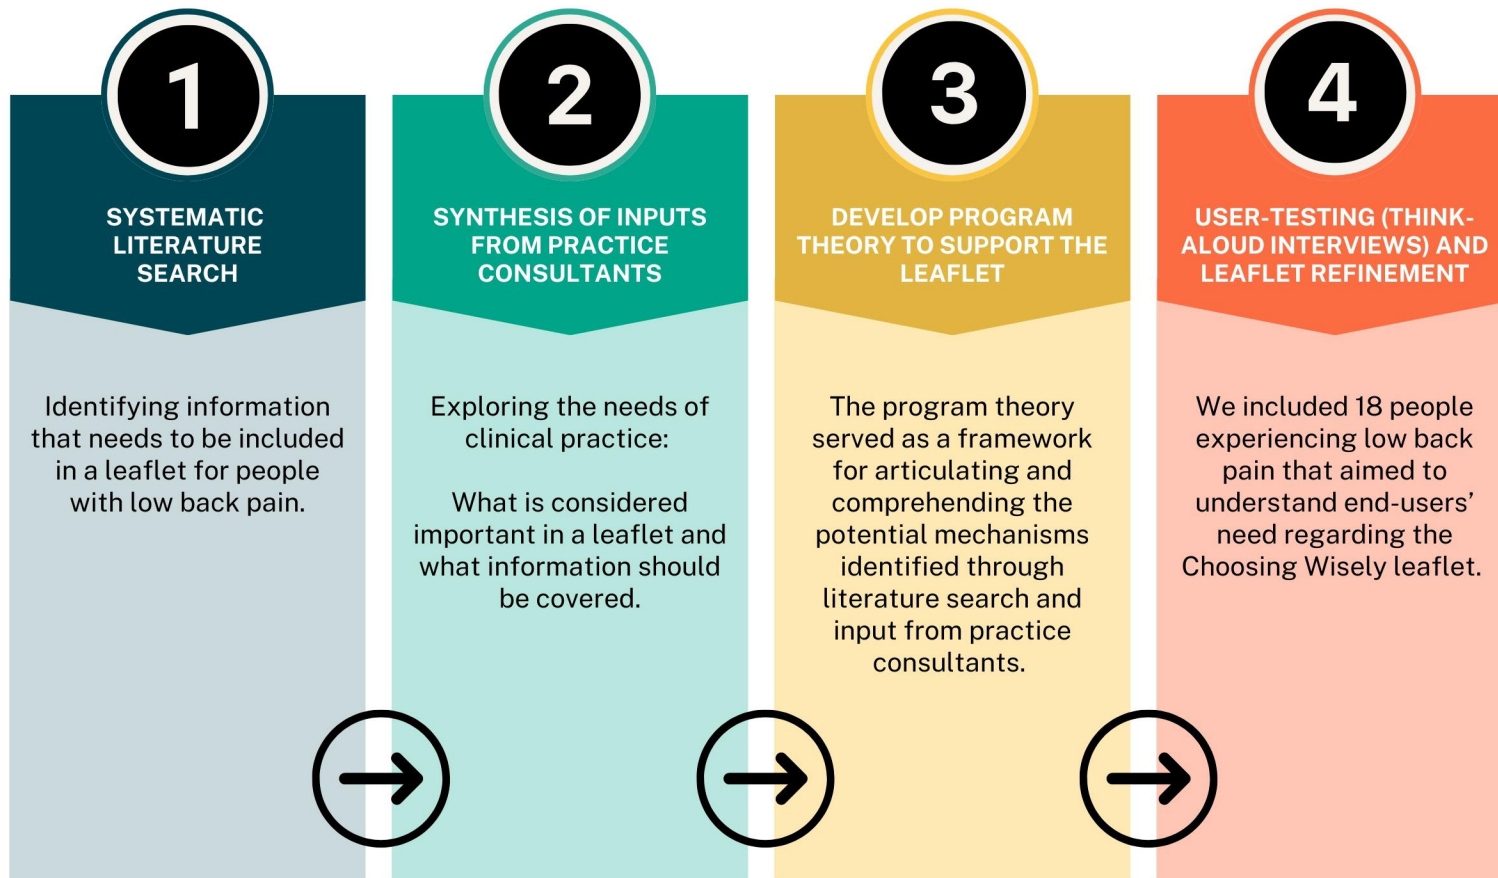

Source: https://medrxiv.org/content/10.1101/2024.07.02.24309693v1.full.pdf
